# Supplementary material
Source: Springer Nature journal article supplement (https://www.springermedizin.de/resource/supplementary/13046_2010_297_MOESM2_ESM.pdf/9662062)

**A**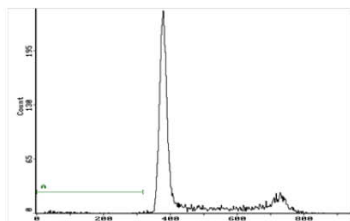**B**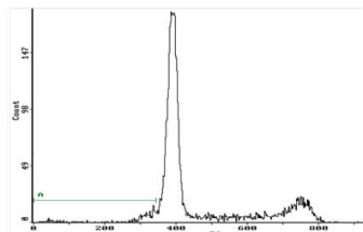**C**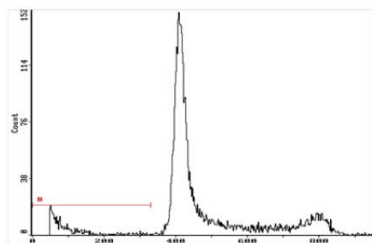**D**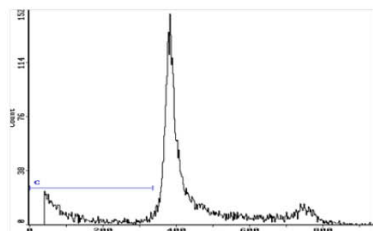**E**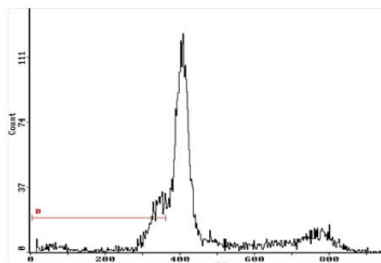**F**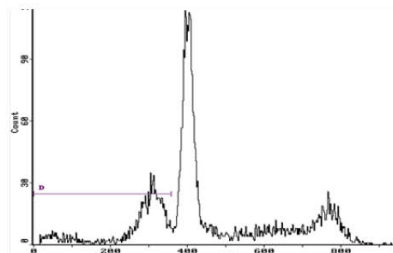

Supplement: MOESM2 [file 9662062]
